# Supplementary material for: Can Grazing Moderate Climatic Effects on Herbage Nutritional Quality?
Source: MDPI journal article supplement (doi:10.3390/agronomy11040700), 2021-04-07
Supplement: s1 [file s1]

Supporting information to the paper: Dovrat, G. et al. 2021, "Can grazing moderate climatic effects on herbage nutritional quality?"

### Supplementary Materials.

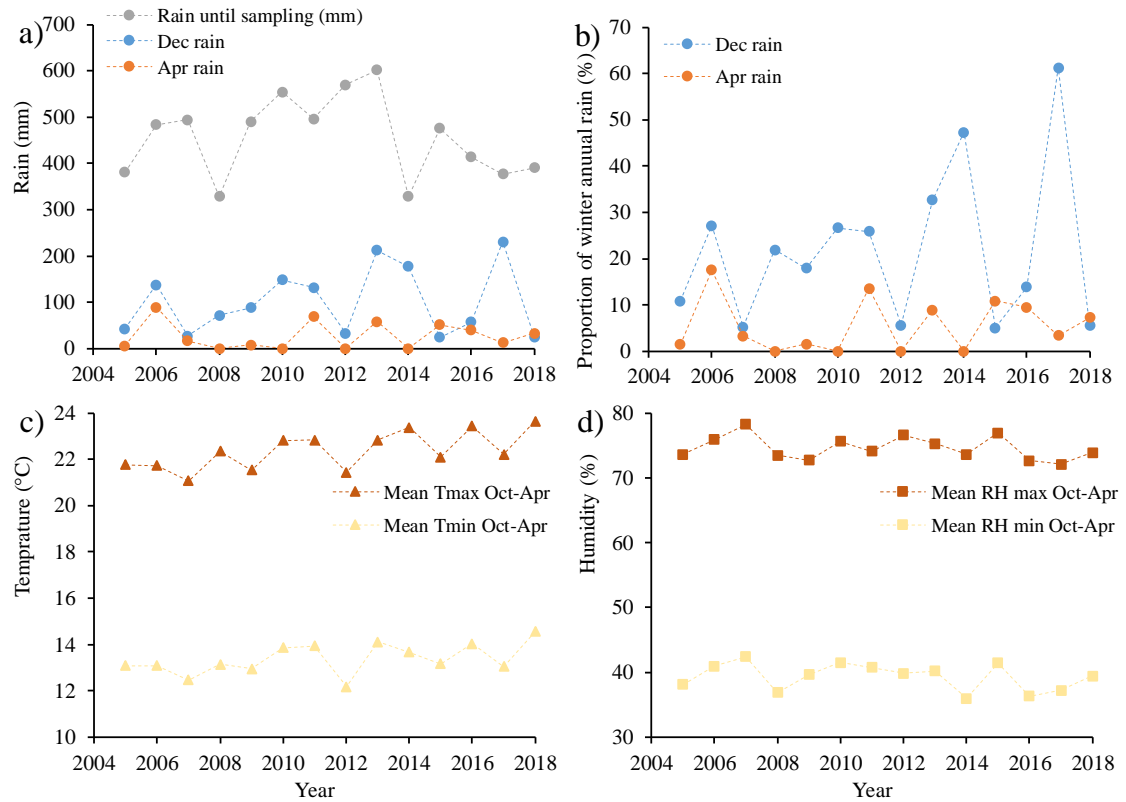

**Figure S1.** Climate data measured at the Karei Deshe Experimental Range Station during the research period, 2005–2018. Nine average climate variables included: accumulated seasonal rainfall amount (until the date of vegetation sampling, mm) presented alongside the amount of accumulated rain until December and until April (a), and the proportions of these rainfall amounts (i.e., percentages of total seasonal rainfall) (b), maximum and minimum temperatures (°C) (c), and maximum and minimum relative air humidity (%) measured daily between October and April (d).

**Table S1.** Calibration performance of the NIRS equations for herbage nutritional composition. SD is the standard deviation of nutritional parameters; SEC and SECV are the standard errors of calibration and cross-validation;  $R^2_{cal}$  and  $R^2_{cv}$  represent linearities of calibration and cross-validation, respectively; RPD (ratio per deviation) is an estimate of calibration quality. Calibrations use the first derivative of NIR spectra.

|                 | N   | Mean  | SD    | SEC  | $R^2_{cal}$ | SE <sub>cv</sub> | $R^2_{CV}$ | RPD   |
|-----------------|-----|-------|-------|------|-------------|------------------|------------|-------|
| ash (g/kg DM)   | 302 | 11.10 | 3.22  | 0.72 | 0.95        | 1.50             | 0.83       | 3.88  |
| CP (g/kg DM)    | 329 | 9.89  | 6.41  | 0.51 | 0.99        | 0.69             | 0.99       | 6.48  |
| NDF (g/kg DM)   | 328 | 59.20 | 10.76 | 1.71 | 0.97        | 2.23             | 0.96       | 11.22 |
| ADF (g/kg DM)   | 331 | 35.13 | 8.00  | 1.14 | 0.98        | 1.37             | 0.97       | 8.24  |
| IVDMD (% of DM) | 188 | 63.22 | 15.26 | 2.61 | 0.97        | 3.69             | 0.94       | 16.15 |

**Tables S2.** Results of the most parsimonious models for each of the five nutritional parameters.

The general structure of the models is:

$$Y_i(t) = a_0 + g_i + b \cdot X(t) + c_i \cdot X(t)$$

where  $Y_i(t)$  is the value of the nutritional parameter in plot  $i$  at year  $t$ ,  $a_0$  is a general intercept,  $g_i$  is a treatment-specific intercept for the grazing intensity treatment in plot  $i$ ,  $b$  is the slope of the effect of  $X(t)$ , a climate variable in year  $t$ , and  $c_i$  is a treatment specific slope for the interactive effect of grazing intensity in plot  $i$  and the climate variable in year  $t$ .

| Parameter | Meaning                                                              | MLE (Lower – Upper S.I.)                                                    |                                                                                                  |                                                                                                        |                                                                                                   |                                                                                     |
|-----------|----------------------------------------------------------------------|-----------------------------------------------------------------------------|--------------------------------------------------------------------------------------------------|--------------------------------------------------------------------------------------------------------|---------------------------------------------------------------------------------------------------|-------------------------------------------------------------------------------------|
|           |                                                                      | NDF as affected by treatment and Maximum daily temperature. Additive model. | Protein as affected by treatment and Maximum daily temperature. Additive with interaction model. | Digestibility as affected by treatment and Maximum daily temperature. Additive with interaction model. | ADF as affected by treatment and Proportion of rain in December. Additive with interaction model. | Ash as affected by treatment and minimum humidity. Additive with interaction model. |
| $a_0$     | General intercept                                                    | -63.671<br>(-64.918 -62.467)                                                | 21.528<br>(21.312 21.528)                                                                        | 59.432<br>(58.837 60.026)                                                                              | 1.809<br>(1.483 2.123)                                                                            | -36.291<br>(-36.874 -35.692)                                                        |
| $g_1$     | No grazing intercept                                                 | 39.251<br>(38.073 40.036)                                                   | 1.007<br>(0.574 1.443)                                                                           | 96.68<br>(95.713 97.647)                                                                               | 34.771<br>(34.424 35.119)                                                                         | 39.07<br>(38.679 39.461)                                                            |
| $g_2$     | Heavy grazing intercept                                              | 33.187<br>(32.192 34.183)                                                   | 32.429<br>(32.104 32.753)                                                                        | 100<br>(99 100)                                                                                        | 31.602<br>(31.286 32.234)                                                                         | 14.213<br>(13.787 14.557)                                                           |
| $g_3$     | Moderate grazing intercept                                           | 38.1<br>(36.957 39.243)                                                     | 3.578<br>(3.113 3.964)                                                                           | 98.541<br>(97.555 99.526)                                                                              | 34.282<br>(33.939 34.624)                                                                         | 32.724<br>(32.396 33.051)                                                           |
| $g_4$     | Very heavy grazing intercept                                         | 31.965<br>(31.006 32.924)                                                   | 32.808<br>(32.479 33.136)                                                                        | 103.411<br>(102.377 104.445)                                                                           | 31.11<br>(30.488 31.421)                                                                          | 23.698<br>(23.461 23.935)                                                           |
| $b$       | linear slope of climate variable                                     | 3.995<br>(33.995 33.995)                                                    | -100<br>(-100 -98.121)                                                                           | -4.594<br>(-4.671 -4.518)                                                                              | -83.974<br>(-85.983 -81.939)                                                                      | 1.877<br>(1.877 1.877)                                                              |
| $c_1$     | Linear slope of the Interaction climate variable × Control treatment | -                                                                           | 29.162<br>(27.412 30.87)                                                                         | -                                                                                                      | 91.344<br>(89.517 93.171)                                                                         | -1.689<br>(-1.716 -1.659)                                                           |
| $c_2$     | Interaction climate factor × Heavy grazing                           | -                                                                           | -100<br>(-100 -97.156)                                                                           | -                                                                                                      | 100<br>(98 100)                                                                                   | -1.042<br>(-1.064 -1.02)                                                            |
| $c_3$     | Interaction Climate variable × Moderate grazing                      | -                                                                           | 19.647<br>(17.733 21.254)                                                                        | -                                                                                                      | 92.79<br>(90.934 94.645)                                                                          | -1.527<br>(-1.554 -1.501)                                                           |
| $c_4$     | Interaction Climate variable × Very heavy grazing                    | -                                                                           | -100<br>(-100 -97.212)                                                                           | -                                                                                                      | 94.757<br>(92.862 96.652)                                                                         | -1.271<br>(-1.295 -1.247)                                                           |
| $sd$      | Normal error model parameter                                         | 5.378<br>(5.002 5.775)                                                      | 1.988<br>(1.850 2.148)                                                                           | 6.26<br>(5.822 6.72)                                                                                   | 2.941<br>(2.765 3.199)                                                                            | 2.081<br>(1.936 2.226)                                                              |

**Tables S3-S7.** Comparison of models that test the effects of grazing intensity treatments and climate variables on herbage nutritional quality parameters. We used additive and multiplicative linear models with one of nine climate variables (as a continuous factor), four grazing treatments, their interaction and the intercept. All models were compared for each nutritional parameter, based on the Akaike information criterion corrected for a small sample size (AICc).

**Table S3.** Comparison of alternative models for NDF (%) of herbage. The models appear according to the order of AICc, with the most parsimonious model first in bold.

| Model type           | Climate variable                                                | Maximum likelihood | No. Parameters | AICc            | R <sup>2</sup> |
|----------------------|-----------------------------------------------------------------|--------------------|----------------|-----------------|----------------|
| <b>Linear</b>        | <b>Maximum daily temperature between October and April</b>      | <b>-1034.302</b>   | <b>7</b>       | <b>2082.947</b> | <b>0.402</b>   |
| Linear               | Maximum daily temperature between October and April             | -1041.368          | 6              | 2094.994        | 0.376          |
| linear + interaction | Maximum daily temperature between October and April             | -1048.031          | 11             | 2118.883        | 0.350          |
| Intercept            | Minimum daily relative humidity between October and April       | -1053.002          | 7              | 2120.348        | 0.331          |
| linear + interaction | Minimum daily relative humidity between October and April       | -1049.021          | 11             | 2120.863        | 0.347          |
| linear + interaction | Minimum daily relative humidity between October and April       | -1053.283          | 7              | 2120.910        | 0.330          |
| linear + interaction | Minimum daily relative humidity between October and April       | -1053.289          | 7              | 2120.921        | 0.347          |
| linear + interaction | Proportion of rain in December                                  | -1050.062          | 11             | 2122.945        | 0.343          |
| Linear               | Minimum daily relative humidity between October and April       | -1055.656          | 6              | 2123.569        | 0.320          |
| linear + interaction | Maximum daily relative humidity between October and April       | -1051.083          | 11             | 2124.986        | 0.338          |
| linear + interaction | Maximum daily relative humidity between October and April       | -1051.233          | 9              | 2125.286        | 0.338          |
| linear + interaction | Rain in December                                                | -1058.217          | 11             | 2139.254        | 0.310          |
| linear + interaction | Minimum daily temperature between October and April             | -1063.531          | 11             | 2149.881        | 0.287          |
| Linear               | Maximum daily temperature between October and April             | -1082.331          | 3              | 2170.661        | 0.202          |
| linear + interaction | Seasonal rainfall amount, until the date of vegetation sampling | -1079.109          | 8              | 2174.661        | 0.218          |
| ANOVA                | -                                                               | -1083.234          | 5              | 2176.651        | 0.198          |
| linear + interaction | Seasonal rainfall amount, until the date of vegetation sampling | -1077.099          | 11             | 2177.018        | 0.227          |
| Intercept            | -                                                               | -1083.231          | 6              | 2178.719        | 0.198          |
| linear + interaction | Rain in April                                                   | -1081.299          | 11             | 2185.418        | 0.207          |
| linear + interaction | Proportion of rain in April                                     | -1081.434          | 11             | 2185.688        | 0.207          |
| Linear               | Minimum daily relative humidity between October and April       | -1096.441          | 3              | 2198.954        | 0.132          |

**Table S4.** Comparison of alternative models for protein (%) of herbage. The models appear according to the order of AICc, with the most parsimonious model first in bold.

| Model type                  | Climate variable                                                | Maximum likelihood | No. Parameters | AICc            | R <sup>2</sup> |
|-----------------------------|-----------------------------------------------------------------|--------------------|----------------|-----------------|----------------|
| <b>linear + interaction</b> | <b>Maximum daily temperature between October and April</b>      | <b>-703.676</b>    | <b>11</b>      | <b>1430.171</b> | <b>0.440</b>   |
| Linear                      | Maximum daily temperature between October and April             | -715.686           | 6              | 1443.630        | 0.398          |
| Linear                      | Maximum daily temperature between October and April             | -715.698           | 7              | 1445.740        | 0.398          |
| linear + interaction        | Minimum daily relative humidity between October and April       | -724.541           | 11             | 1471.903        | 0.365          |
| linear + interaction        | Minimum daily relative humidity between October and April       | -728.848           | 7              | 1472.040        | 0.365          |
| linear + interaction        | Minimum daily relative humidity between October and April       | -728.860           | 7              | 1472.064        | 0.349          |
| Intercept                   | Minimum daily relative humidity between October and April       | -730.462           | 7              | 1475.268        | 0.342          |
| linear + interaction        | Proportion of rain in December                                  | -729.188           | 11             | 1481.196        | 0.347          |
| linear + interaction        | Maximum daily relative humidity between October and April       | -729.766           | 11             | 1482.353        | 0.345          |
| linear + interaction        | Maximum daily relative humidity between October and April       | -729.874           | 9              | 1482.567        | 0.345          |
| linear + interaction        | Minimum daily temperature between October and April             | -730.627           | 11             | 1484.073        | 0.342          |
| linear + interaction        | Rain in December                                                | -733.551           | 11             | 1489.923        | 0.330          |
| Linear                      | Minimum daily relative humidity between October and April       | -741.529           | 6              | 1495.315        | 0.297          |
| linear + interaction        | Seasonal rainfall amount, until the date of vegetation sampling | -754.471           | 8              | 1525.385        | 0.241          |
| ANOVA                       | -                                                               | -757.900           | 5              | 1525.983        | 0.225          |
| Intercept                   | -                                                               | -757.899           | 6              | 1528.054        | 0.225          |
| linear + interaction        | Seasonal rainfall amount, until the date of vegetation sampling | -753.834           | 11             | 1530.488        | 0.244          |
| linear + interaction        | Rain in April                                                   | -754.149           | 11             | 1531.117        | 0.242          |
| linear + interaction        | Proportion of rain in April                                     | -754.359           | 11             | 1531.539        | 0.241          |
| Multiplicative              | Maximum daily temperature between October and April             | -762.641           | 6              | 1537.540        | 0.203          |
| Linear                      | Maximum daily temperature between October and April             | -768.954           | 3              | 1543.98         | 0.172          |

**Table S5.** Comparison of alternative models for digestibility (%) of herbage. The models appear according to the order of AICc, with the most parsimonious model first in bold.

| Model type           | Climate variable                                           | Maximum likelihood | No. Parameters | AICc            | R <sup>2</sup> |
|----------------------|------------------------------------------------------------|--------------------|----------------|-----------------|----------------|
| <b>Linear</b>        | <b>Maximum daily temperature between October and April</b> | <b>-1085.036</b>   | <b>7</b>       | <b>2184.415</b> | <b>0.329</b>   |
| linear + interaction | Maximum daily relative humidity between October and April  | -1091.585          | 9              | 2205.990        | 0.302          |
| linear + interaction | Maximum daily relative humidity between October and April  | -1092.070          | 11             | 2206.961        | 0.300          |
| linear + interaction | Maximum daily relative humidity between October and April  | -1097.326          | 7              | 2208.996        | 0.302          |
| Intercept            | Maximum daily relative humidity between October and April  | -1097.609          | 7              | 2209.562        | 0.276          |
| Linear               | Maximum daily temperature between October and April        | -1102.542          | 6              | 2217.341        | 0.255          |
| linear + interaction | Minimum daily relative humidity between October and April  | -1098.857          | 11             | 2220.535        | 0.271          |
| linear + interaction | Maximum daily temperature between October and April        | -1101.854          | 11             | 2226.528        | 0.258          |

|                      |                                                                 |           |    |          |       |
|----------------------|-----------------------------------------------------------------|-----------|----|----------|-------|
| linear + interaction | Proportion of rain in December                                  | -1103.282 | 11 | 2229.385 | 0.252 |
| Linear               | Maximum daily relative humidity between October and April       | -1110.901 | 6  | 2234.059 | 0.217 |
| Linear               | Maximum daily relative humidity between October and April       | -1120.433 | 3  | 2246.938 | 0.170 |
| linear + interaction | Minimum daily temperature between October and April             | -1112.581 | 11 | 2247.981 | 0.209 |
| linear + interaction | Seasonal rainfall amount, until the date of vegetation sampling | -1116.824 | 8  | 2250.092 | 0.188 |
| linear + interaction | Seasonal rainfall amount, until the date of vegetation sampling | -1114.830 | 11 | 2252.480 | 0.198 |
| linear + interaction | Rain in December                                                | -1115.676 | 11 | 2254.172 | 0.194 |
| Linear               | Maximum daily temperature between October and April             | -1124.893 | 3  | 2255.858 | 0.148 |
| ANOVA                | -                                                               | -1132.801 | 5  | 2275.785 | 0.107 |
| Intercept            | -                                                               | -1132.794 | 6  | 2277.846 | 0.107 |
| linear + interaction | Proportion of rain in April                                     | -1129.250 | 11 | 2281.321 | 0.126 |
| linear + interaction | Rain in April                                                   | -1130.076 | 11 | 2282.971 | 0.121 |
| Multiplicative       | Maximum daily temperature between October and April             | -1135.404 | 6  | 2283.065 | 0.093 |

**Table S6.** Comparison of alternative models for ADF (%) of herbage. The models appear according to the order of AICc, with the most parsimonious model first in bold.

| Model type                  | Climate variable                                                | Maximum likelihood | No. Parameters | AICc            | R <sup>2</sup> |
|-----------------------------|-----------------------------------------------------------------|--------------------|----------------|-----------------|----------------|
| <b>linear + interaction</b> | <b>Proportion of rain in December</b>                           | <b>-836.255</b>    | <b>11</b>      | <b>1695.330</b> | <b>0.351</b>   |
| Linear                      | Proportion of rain in December                                  | -841.562           | 6              | 1695.381        | 0.330          |
| Linear                      | Proportion of rain in December                                  | -841.562           | 7              | 1697.467        | 0.330          |
| Linear                      | Maximum daily temperature between October and April             | -846.749           | 7              | 1707.842        | 0.308          |
| Linear                      | Maximum daily temperature between October and April             | -850.242           | 6              | 1712.742        | 0.294          |
| linear + interaction        | Maximum daily temperature between October and April             | -847.508           | 11             | 1717.837        | 0.305          |
| linear + interaction        | Rain in December                                                | -851.726           | 11             | 1726.272        | 0.288          |
| linear + interaction        | Minimum daily relative humidity between October and April       | -854.348           | 11             | 1731.515        | 0.276          |
| Linear                      | Proportion of rain in December                                  | -865.0783          | 3              | 1736.229        | 0.228          |
| Linear                      | Maximum daily temperature between October and April             | -869.6673          | 3              | 1745.407        | 0.206          |
| linear + interaction        | Maximum daily relative humidity between October and April       | -862.099           | 9              | 1747.018        | 0.242          |
| linear + interaction        | Maximum daily relative humidity between October and April       | -862.114           | 11             | 1747.049        | 0.242          |
| linear + interaction        | Minimum daily temperature between October and April             | -871.948           | 11             | 1766.715        | 0.196          |
| linear + interaction        | Seasonal rainfall amount, until the date of vegetation sampling | -884.164           | 8              | 1784.771        | 0.135          |
| linear + interaction        | Seasonal rainfall amount, until the date of vegetation sampling | -881.867           | 11             | 1786.554        | 0.147          |
| ANOVA                       | -                                                               | -890.579           | 5              | 1791.341        | 0.101          |
| Intercept                   | -                                                               | -890.577           | 6              | 1793.411        | 0.101          |
| linear + interaction        | Rain in April                                                   | -887.439           | 11             | 1797.697        | 0.118          |
| linear + interaction        | Proportion of rain in April                                     | -888.112           | 11             | 1799.043        | 0.114          |

**Table S7.** Comparison of alternative models for ash (%) of herbage. The models appear according to the order of AICc, with the most parsimonious model first in bold.

| Model type                  | Climate variable                                                 | Maximum likelihood | No. Parameters | AIC corr        | R <sup>2</sup> |
|-----------------------------|------------------------------------------------------------------|--------------------|----------------|-----------------|----------------|
| <b>linear + interaction</b> | <b>Minimum daily relative humidity between October and April</b> | <b>-717.140</b>    | <b>11</b>      | <b>1457.099</b> | <b>0.256</b>   |
| linear + interaction        | Minimum daily relative humidity between October and April        | -725.573           | 7              | 1465.489        | 0.217          |
| linear + interaction        | Maximum daily relative humidity between October and April        | -725.577           | 7              | 1465.498        | 0.256          |
| Intercept                   | Minimum daily relative humidity between October and April        | -726.125           | 7              | 1466.594        | 0.214          |
| Linear                      | Minimum daily relative humidity between October and April        | -733.188           | 3              | 1472.449        | 0.181          |
| linear + interaction        | Maximum daily relative humidity between October and April        | -725.207           | 9              | 1473.234        | 0.219          |
| linear + interaction        | Maximum daily relative humidity between October and April        | -731.970           | 7              | 1478.283        | 0.219          |
| Intercept                   | Maximum daily relative humidity between October and April        | -732.208           | 7              | 1478.760        | 0.185          |
| Linear                      | Minimum daily relative humidity between October and April        | -735.001           | 6              | 1482.259        | 0.172          |
| linear + interaction        | Seasonal rainfall amount, until the date of vegetation sampling  | 730.341            | 11             | 1483.501        | 0.194          |
| linear + interaction        | Seasonal rainfall amount, until the date of vegetation sampling  | -733.585           | 8              | 1483.613        | 0.179          |
| Linear                      | Maximum daily relative humidity between October and April        | -738.911           | 3              | 1483.894        | 0.152          |
| linear + interaction        | Maximum daily relative humidity between October and April        | -732.206           | 11             | 1487.231        | 0.185          |
| linear + interaction        | Maximum daily temperature between October and April              | -741.529           | 11             | 1505.877        | 0.139          |
| linear + interaction        | Proportion of rain in December                                   | -742.457           | 11             | 1507.733        | 0.134          |
| Linear                      | Maximum daily relative humidity between October and April        | -748.436           | 6              | 1509.130        | 0.102          |
| ANOVA                       | -                                                                | -760.721           | 5              | 1531.625        | 0.034          |
| linear + interaction        | Rain in December                                                 | -755.251           | 11             | 1533.322        | 0.065          |
| linear + interaction        | Minimum daily temperature between October and April              | -755.400           | 11             | 1533.620        | 0.064          |
| Intercept                   | -                                                                | -760.717           | 6              | 1533.691        | 0.034          |
| linear + interaction        | Rain in April                                                    | -756.946           | 11             | 1536.713        | 0.055          |

**Table S8.** Data from the experiment.

| Year | Treatment | Ash   | ADF   | Digestibility | NDF   | Protein | Proportion of rain in Dec. | Minimum daily relative humidity between Oct.-April | Maximum daily temperature between Oct.-April |
|------|-----------|-------|-------|---------------|-------|---------|----------------------------|----------------------------------------------------|----------------------------------------------|
| 2005 | Cont.     | 10.43 | 37.14 | 54.64         | 64.45 | 7.32    | 10.89                      | 38.13                                              | 21.76                                        |
| 2006 | Cont.     | 10.36 | 35.79 | 57.81         | 60.91 | 7.31    | 27.17                      | 40.97                                              | 21.72                                        |
| 2007 | Cont.     | 10.97 | 35.75 | 57.55         | 59.91 | 8.74    | 5.20                       | 42.42                                              | 21.08                                        |
| 2008 | Cont.     | 10.39 | 36.76 | 56.81         | 60.06 | 7.59    | 21.88                      | 36.88                                              | 22.34                                        |
| 2009 | Cont.     | 10.10 | 35.58 | 57.34         | 60.11 | 7.11    | 17.94                      | 39.66                                              | 21.53                                        |
| 2010 | Cont.     | 11.00 | 40.92 | 51.44         | 67.57 | 5.63    | 26.64                      | 41.53                                              | 22.81                                        |
| 2011 | Cont.     | 10.57 | 38.85 | 48.06         | 64.70 | 6.72    | 25.86                      | 40.76                                              | 22.83                                        |
| 2012 | Cont.     | 10.26 | 37.34 | 61.28         | 63.16 | 6.08    | 5.68                       | 39.85                                              | 21.43                                        |
| 2013 | Cont.     | 11.41 | 37.50 | 59.12         | 63.34 | 6.67    | 32.71                      | 40.21                                              | 22.82                                        |
| 2014 | Cont.     | 9.13  | 40.29 | 51.49         | 69.08 | 5.05    | 47.33                      | 35.94                                              | 23.36                                        |

|      |           |       |       |       |       |       |       |       |       |
|------|-----------|-------|-------|-------|-------|-------|-------|-------|-------|
| 2015 | Cont.     | 10.36 | 37.44 | 52.58 | 64.12 | 7.93  | 5.04  | 41.42 | 22.09 |
| 2016 | Cont.     | 9.79  | 41.50 | 46.12 | 70.66 | 5.26  | 13.91 | 36.30 | 23.42 |
| 2017 | Cont.     | 9.19  | 42.28 | 46.55 | 72.44 | 4.95  | 61.27 | 37.22 | 22.22 |
| 2018 | Cont.     | 8.86  | 37.95 | 46.34 | 67.92 | 7.52  | 5.53  | 39.40 | 23.65 |
| 2005 | Heavy     | 11.91 | 33.59 | 61.87 | 52.82 | 10.37 | 10.89 | 38.13 | 21.76 |
| 2006 | Heavy     | 13.83 | 33.51 | 63.87 | 49.94 | 11.15 | 27.17 | 40.97 | 21.72 |
| 2007 | Heavy     | 13.95 | 32.01 | 66.13 | 49.78 | 13.77 | 5.20  | 42.42 | 21.08 |
| 2008 | Heavy     | 11.42 | 37.53 | 55.89 | 58.09 | 8.74  | 21.88 | 36.88 | 22.34 |
| 2009 | Heavy     | 10.20 | 35.91 | 57.35 | 58.04 | 11.03 | 17.94 | 39.66 | 21.53 |
| 2010 | Heavy     | 13.66 | 37.93 | 57.93 | 58.76 | 8.03  | 26.64 | 41.53 | 22.81 |
| 2011 | Heavy     | 12.59 | 34.73 | 57.26 | 56.20 | 10.88 | 25.86 | 40.76 | 22.83 |
| 2012 | Heavy     | 11.97 | 34.36 | 64.24 | 56.68 | 9.92  | 5.68  | 39.85 | 21.43 |
| 2013 | Heavy     | 11.08 | 38.89 | 56.08 | 64.98 | 6.90  | 32.71 | 40.21 | 22.82 |
| 2014 | Heavy     | 6.09  | 42.27 | 49.51 | 66.09 | 6.77  | 47.33 | 35.94 | 23.36 |
| 2015 | Heavy     | 9.74  | 35.28 | 57.79 | 56.71 | 10.75 | 5.04  | 41.42 | 22.09 |
| 2016 | Heavy     | 9.60  | 39.66 | 46.12 | 61.62 | 7.72  | 13.91 | 36.30 | 23.42 |
| 2017 | Heavy     | 5.99  | 44.36 | 41.61 | 70.54 | 5.75  | 61.27 | 37.22 | 22.22 |
| 2018 | Heavy     | 8.69  | 37.33 | 57.63 | 63.00 | 7.23  | 5.53  | 39.40 | 23.65 |
| 2005 | Moderate  | 9.98  | 35.32 | 58.63 | 63.27 | 7.05  | 10.89 | 38.13 | 21.76 |
| 2006 | Moderate  | 10.38 | 35.74 | 57.97 | 60.36 | 6.32  | 27.17 | 40.97 | 21.72 |
| 2007 | Moderate  | 11.78 | 35.61 | 57.93 | 59.13 | 8.55  | 5.20  | 42.42 | 21.08 |
| 2008 | Moderate  | 10.03 | 37.99 | 54.27 | 63.95 | 8.30  | 21.88 | 36.88 | 22.34 |
| 2009 | Moderate  | 10.07 | 34.89 | 59.79 | 59.20 | 8.87  | 17.94 | 39.66 | 21.53 |
| 2010 | Moderate  | 11.77 | 40.27 | 56.05 | 62.81 | 5.97  | 26.64 | 41.53 | 22.81 |
| 2011 | Moderate  | 10.76 | 39.90 | 44.76 | 66.71 | 6.55  | 25.86 | 40.76 | 22.83 |
| 2012 | Moderate  | 11.04 | 36.63 | 61.56 | 62.07 | 7.49  | 5.68  | 39.85 | 21.43 |
| 2013 | Moderate  | 11.34 | 39.18 | 55.81 | 66.26 | 6.75  | 32.71 | 40.21 | 22.82 |
| 2014 | Moderate  | 7.98  | 40.35 | 54.17 | 66.18 | 6.44  | 47.33 | 35.94 | 23.36 |
| 2015 | Moderate  | 9.28  | 38.16 | 52.88 | 63.23 | 9.24  | 5.04  | 41.42 | 22.09 |
| 2016 | Moderate  | 10.42 | 39.04 | 54.17 | 64.15 | 6.05  | 13.91 | 36.30 | 23.42 |
| 2017 | Moderate  | 8.44  | 41.43 | 51.36 | 68.58 | 5.03  | 61.27 | 37.22 | 22.22 |
| 2018 | Moderate  | 9.12  | 37.40 | 53.44 | 66.47 | 6.88  | 5.53  | 39.40 | 23.65 |
| 2005 | Very Hea. | 11.97 | 31.35 | 66.65 | 53.67 | 11.06 | 10.89 | 38.13 | 21.76 |
| 2006 | Very Hea. | 15.64 | 29.93 | 70.46 | 46.40 | 15.89 | 27.17 | 40.97 | 21.72 |
| 2007 | Very Hea. | 15.53 | 29.74 | 70.55 | 42.73 | 13.99 | 5.20  | 42.42 | 21.08 |
| 2008 | Very Hea. | 11.58 | 36.53 | 57.77 | 56.99 | 10.03 | 21.88 | 36.88 | 22.34 |
| 2009 | Very Hea. | 11.24 | 31.40 | 66.75 | 51.86 | 11.21 | 17.94 | 39.66 | 21.53 |
| 2010 | Very Hea. | 13.89 | 36.28 | 60.45 | 57.12 | 9.08  | 26.64 | 41.53 | 22.81 |
| 2011 | Very Hea. | 10.21 | 37.74 | 52.35 | 63.67 | 7.58  | 25.86 | 40.76 | 22.83 |
| 2012 | Very Hea. | 10.69 | 35.75 | 65.70 | 59.91 | 8.56  | 5.68  | 39.85 | 21.43 |
| 2013 | Very Hea. | 11.32 | 36.89 | 58.99 | 62.71 | 7.73  | 32.71 | 40.21 | 22.82 |
| 2014 | Very Hea. | 9.10  | 38.85 | 57.22 | 63.55 | 6.78  | 47.33 | 35.94 | 23.36 |
| 2015 | Very Hea. | 8.31  | 36.83 | 56.84 | 62.25 | 8.48  | 5.04  | 41.42 | 22.09 |
| 2016 | Very Hea. | 10.32 | 38.40 | 49.43 | 64.99 | 6.88  | 13.91 | 36.30 | 23.42 |
| 2017 | Very Hea. | 7.82  | 40.20 | 49.72 | 64.95 | 7.76  | 61.27 | 37.22 | 22.22 |
| 2018 | Very Hea. | 9.87  | 33.61 | 59.59 | 56.40 | 9.14  | 5.53  | 39.40 | 23.65 |
